# Supplementary material
Source: HighWire-hosted journal article supplement (https://jnm.snmjournals.org/highwire/filestream/95251/field_highwire_adjunct_files/0/199778_Supplemental_Data.pdf)
Supplement: 199778_Supplemental_Data.pdf [file 199778_Supplemental_Data.pdf]

| Case | Baseline PET        |                    | Follow-up PET       |                    | Change in %         |                    | Response / Survival        |     |     |
|------|---------------------|--------------------|---------------------|--------------------|---------------------|--------------------|----------------------------|-----|-----|
|      | SUV <sub>mean</sub> | SUV <sub>max</sub> | SUV <sub>mean</sub> | SUV <sub>max</sub> | SUV <sub>mean</sub> | SUV <sub>max</sub> | Best Response <sup>#</sup> | PFS | OS  |
| #1   | 3.3                 | 3.8                | 2.7                 | 3.1                | -18.8               | -18.3              | PR                         | n/r | s/a |
| #2   | 3.3                 | 4.0                | 2.9                 | 3.3                | -12.2               | -17.5              | SD                         | 8   | 25  |
| #3   | 4.9*                | 6.3                | 3.6                 | 4.2                | -26.5               | -33.3              | SD                         | 8   | 21  |
| #4   | 3.7                 | 4.7                | 2.5                 | 2.6                | -32.4               | -44.7              | PR                         | n/r | s/a |
| #5   | 5.8*                | 11.8               | 6.3                 | 14.1               | 8.6                 | 19.5               | PR                         | n/r | s/a |
| #6   | 4.1*                | 8.3                | 4.9                 | 11.3               | 19.5                | 36.1               | SD                         | 5   | 53  |
| #7   | 3.9                 | 4.6                | 3.6                 | 5.9                | -7.7                | 28.3               | SD                         | n/r | 48  |
| #8   | 4.3*                | 7.8                | 2.4                 | 2.4                | -44.2               | -69.2              | PR                         | 25  | 42  |
| #9   | 3.3                 | 3.8                | 2.2                 | 2.2                | -33.3               | -42.1              | PR                         | n/r | s/a |
| #10  | 4.9*                | 6.7                | 2.3                 | 2.6                | -53.1               | -61.2              | SD                         | n/r | s/a |
| #11  | 5.6*                | 11.7               | 4.5                 | 9.9                | -19.6               | -15.4              | PR                         | n/r | s/a |
| #12  | 13.4*               | 37.5               | 6.1                 | 16.3               | -54.5               | -56.5              | PR                         | 4   | 11  |
| #13  | 4.3*                | 9                  | n/a                 | n/a                | n/a                 | n/a                | SD                         | 24  | s/a |
| #14  | 27.4*               | 21.9               | n/a                 | n/a                | n/a                 | n/a                | n/a (side effects)         | 3   | 24  |
| #15  | 7*                  | 8                  | 2.1                 | 2.8                | 70                  | -65                | PR                         | 9   | 43  |
| #16  | 5.6*                | 7                  | 6.6                 | 9.2                | -17.9               | 31.4               | SD                         | n/r | s/a |
| #17  | 3.2                 | 4.2                | 1.6                 | 2.2                | -50                 | -47.6              | SD                         | n/r | s/a |
| #18  | 6.8*                | 9.2                | 3.1                 | 4.2                | -54.4               | -54.4              | CR                         | 26  | s/a |

**Supplemental Table 1. SUV<sub>mean/max</sub> = mean/maximum standardized uptake, the changes in % as well as Response Evaluation (Best Response), Progression-Free (PFS) and Overall Survival (OS) given for every case in months.** Whole cohort. CR = Complete Response, PET = positron emission tomography, PD = Progressive Disease, PR = Partial Response, SD = Stable Disease. n/a = not available; n/r = not reached at date of censoring; s/a = still alive at date of censoring. \* = above the cut-off value which had reached

significance according to receiver operating characteristic analysis (see Table 3, baseline  $SUV_{mean}$ , cut-off: 4).  
# = best response achieved by computed tomography criteria (Response Evaluation Criteria In Solid Tumors 1.1) during follow-up (13).
